# Supplementary material for: High-frequency ultrasonic pyrolysis of 200 nm ultrafine Fe-doped NiO hollow spheres for efficient oxygen evolution catalysis
Source: Royal Society of Chemistry journal article supplement (doi:10.1039/d2nj03654a), 2022-01-01
Supplement: d2nj03654a4.pdf [file d2nj03654a4.pdf]

**High-frequency ultrasonic pyrolysis of 200 nm ultrafine Fe-doped NiO hollow spheres for efficient oxygen evolution catalysis**

*Yadong Liu<sup>§</sup>, Yong Wang<sup>§</sup>, Yongzhi Zhao, Luan Liu, Sijia Liu, Deyin zhang, Haoyang Wu, Baorui Jia\*, Lin Zhang\*, Mingli Qin\*, Xuanhui Qu\**

Y. Liu, Y. Wang, Y. Zhao, L. Liu, S. Liu, D. Zhang, H. Wu, Prof. B. Jia, Prof.

L. Zhang, Prof. M. Qin, Prof. X. Qu

Institute for Advanced Materials and Technology

University of Science and Technology Beijing

Beijing 100083, China

Email: jiabaorui@ustb.edu.cn (Assoc. Prof. B. Jia); zlin@ustb.edu.cn (Prof. L.

Zhang); qinml@mater.ustb.edu.cn (Prof. M Qin); quxh@ustb.edu.cn (Prof. X. Qu)

Y. Liu<sup>§</sup> and Y. Wang<sup>§</sup> contributed equally to this work.

Prof. M. Qin, Prof. L. Zhang, Prof. X. Qu

Beijing Advanced Innovation Center for Materials Genome Engineering

University of Science and Technology Beijing

Beijing 100083, China

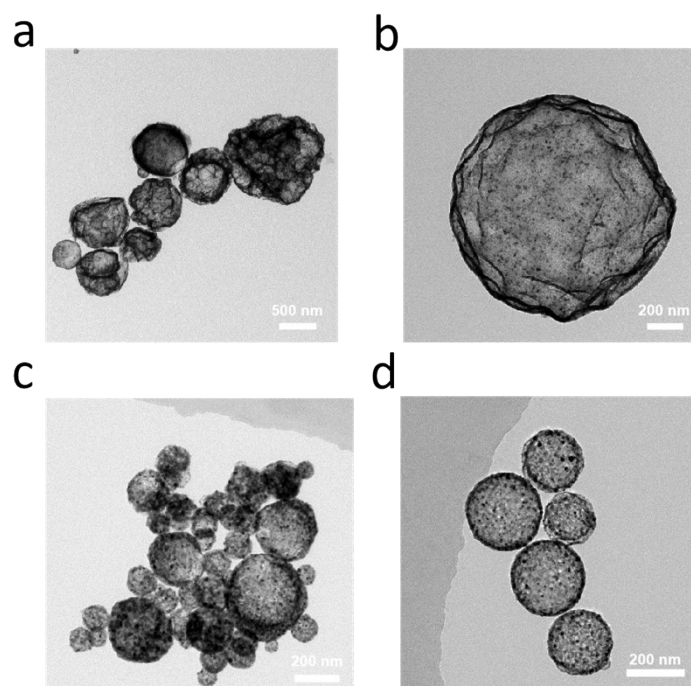

**Supplementary Figure 1.** (a, b) TEM images of NiO hollow nanospheres at 1.7 MHz frequency. (c, d) TEM images of NiO hollow nanospheres at 3.0 MHz frequency.

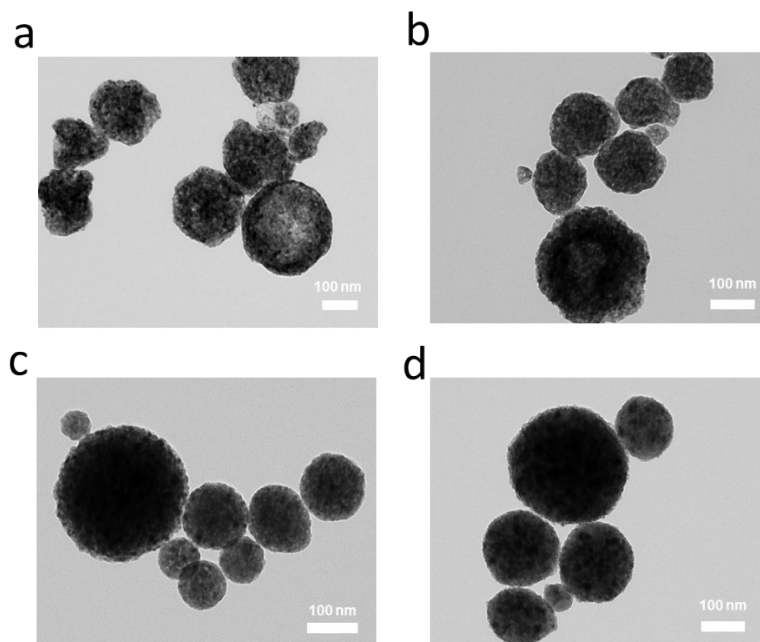

**Supplementary Figure 2.** TEM images of  $\text{Ni}_{0.8}\text{Fe}_{0.2}\text{O}$ ,  $\text{Ni}_{0.7}\text{Fe}_{0.3}\text{O}$ ,  $\text{Ni}_{0.6}\text{Fe}_{0.4}\text{O}$  and  $\text{Ni}_{0.5}\text{Fe}_{0.5}\text{O}$ .

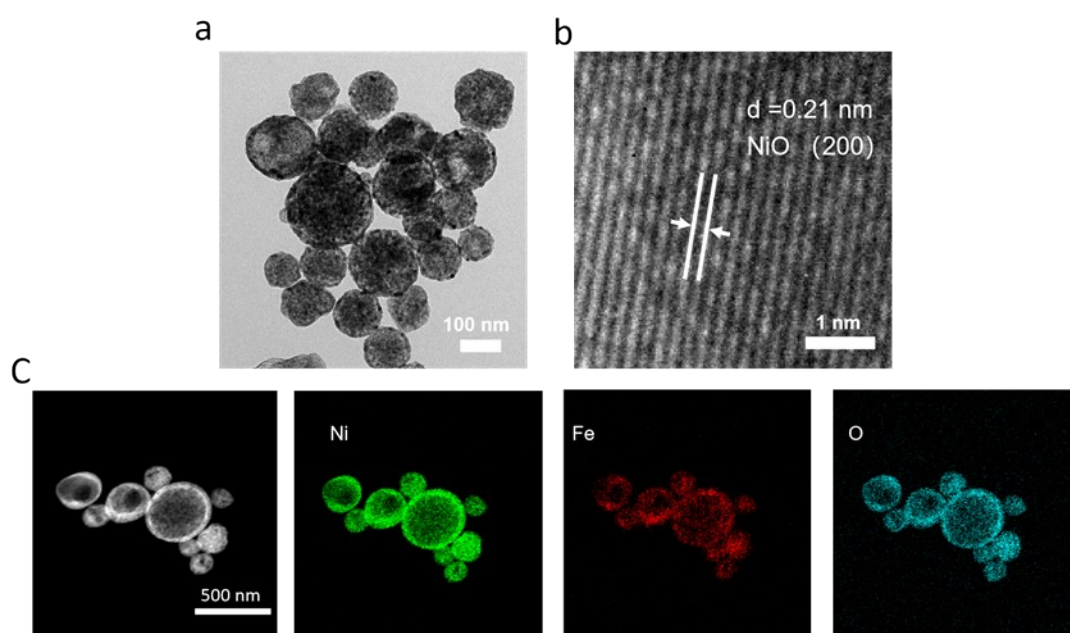

**Supplementary Figure 3.** (a) TEM image, (b) HRTEM image and (c) EDS mapping of  $\text{Ni}_{0.9}\text{Fe}_{0.1}\text{O}$  hollow nanospheres after OER.

**Supplementary Table 1.** Comparisons of the  $\eta_{10}$  of  $\text{Ni}_{0.9}\text{Fe}_{0.1}\text{O}$  hollow nanospheres with representative electrocatalysts reported previously.

| <b>Catalyst</b>                                                                  | <b>Electrode substrate</b> | <b>Overpotential (mV)</b> | <b>Electrolyte</b> | <b>Reference</b> |
|----------------------------------------------------------------------------------|----------------------------|---------------------------|--------------------|------------------|
| <b><math>\text{Ni}_{0.9}\text{Fe}_{0.1}\text{O}</math> hollow nanospheres</b>    | Glassy carbon              | 288                       | 1 M KOH            | This work        |
| <b>Hollow cobalt nickel oxides microspheres</b>                                  | Glassy carbon              | 310                       | 1 M KOH            | 1                |
| <b>Porous NiO hollow spheres</b>                                                 | Glassy carbon              | 323                       | 1 M KOH            | 2                |
| <b>Porous NiO nano flowers</b>                                                   | Glassy carbon              | 346                       | 1 M KOH            | 2                |
| <b>3D porous carbon@Ni/NiO</b>                                                   | Glassy carbon              | 353                       | 1 M KOH            | 3                |
| <b>Ni-Co mixed oxide nanocages</b>                                               | Glassy carbon              | 380                       | 1 M KOH            | 4                |
| <b>Hollow <math>\text{NiCo}_2\text{O}_4</math> arrays</b>                        | Glassy carbon              | 340                       | 1 M KOH            | 5                |
| <b><math>\text{CoNiO}_2/\text{SNC}</math></b>                                    | Glassy carbon              | 280                       | 1 M KOH            | 6                |
| <b><math>\text{CoNiO}_x/\text{NC}</math></b>                                     | Glassy carbon              | 335                       | 1 M KOH            | 6                |
| <b>Multi-shelled <math>\text{Co}_{0.5}\text{Ni}_{0.5}</math> oxide/phosphide</b> | Glassy carbon              | 268                       | 1 M KOH            | 7                |
| <b>Porous nanoscale NiO/<math>\text{NiCo}_2\text{O}_4</math></b>                 | Glassy carbon              | 264                       | 1 M KOH            | 8                |
| <b>U-<math>\text{NiO}/\text{NiCo}_2\text{O}_4</math></b>                         | Glassy carbon              | 387                       | 0.1M KOH           | 9                |
| <b>C-<math>\text{NiO}/\text{NiCo}_2\text{O}_4</math></b>                         | Glassy carbon              | 430                       | 0.1M KOH           | 9                |
| <b>Multilayer hollow <math>\text{MnCo}_2\text{O}_4</math> microsphere</b>        | Glassy carbon              | 400                       | 0.1M KOH           | 10               |
| <b>3D <math>\text{NiFe}_2\text{O}_4</math> hollow spheres</b>                    | Glassy carbon              | 370                       | 0.1M KOH           | 11               |

## References :

- 1 J. Zhao, X. Wang, X. Wang, Y. Li, X. Yang, G. Li and F. Li, Ultrathin Porous Nanosheet-Assembled Hollow Cobalt Nickel Oxide Microspheres with Optimized Compositions for Efficient Oxygen Evolution Reaction, *Inorg. Chem. Front.*, 2018, **5**, 1886-1893.
- 2 B. P. Reddy, K. Mallikarjuna, M. Kumar, M. C. Sekhar, Y. Suh and S. Park, Highly Porous Metal Organic Framework Derived NiO Hollow Spheres and Flowers for Oxygen Evolution Reaction and Supercapacitors, *Ceram. Int.*, 2021, **47**, 3312-3321.
- 3 Y. Li, J. Huang, G. Rao, C. Wu, X. Du, Y. Sun, X. Wang and C. Yang, Enhanced Water Oxidation Activity of 3D Porous Carbon by Incorporation of Heterogeneous Ni/NiO Nanoparticles, *Appl. Surf. Sci.*, 2020, **530**, 147192.
- 4 L. Han, X. Yu and X. W. D. Lou, Formation of Prussian-Blue-Analog Nanocages Via a Direct Etching Method and their Conversion Into Ni-Co-Mixed Oxide for Enhanced Oxygen Evolution, *Adv. Mater.*, 2016, **28**, 4601-4605.
- 5 C. Guan, X. Liu, W. Ren, X. Li, C. Cheng and J. Wang, Rational Design of Metal-Organic Framework Derived Hollow NiCo<sub>2</sub>O<sub>4</sub> Arrays for Flexible Supercapacitor and Electrocatalysis, *Adv. Energy Mater.*, 2017, **7**, 1602391.
- 6 Q. Zhang, W. Han, Z. Xu, Y. Li, L. Chen, Z. Bai, L. Yang and X. Wang, Hollow Waxberry-Like Cobalt-Nickel Oxide/S,N-Codoped Carbon Nanospheres as a Trifunctional electrocatalyst for OER, ORR, and HER, *RSC Adv.*, 2020, **10**, 27788-27793.
- 7 Y. Yang, H. Wan, G. Chen, N. Zhang, J. Li, W. Ma, X. Liu and R. Ma, Multi-Shelled Cobalt-Nickel Oxide/Phosphide Hollow Spheres for an Efficient Oxygen Evolution Reaction, *Dalton Trans.*, 2020, **49**, 10918-10927.
- 8 S. Sun, X. Jin, B. Cong, X. Zhou, W. Hong and G. Chen, Construction of porous nanoscale NiO/NiCo<sub>2</sub>O<sub>4</sub> heterostructure for highly enhanced electrocatalytic oxygen evolution activity, *J. Catal.*, 2019, **379**, 1-9.
- 9 A. Cetin and E. N. Esenturk, Hierarchical Nanowire and Nanoplate-Assembled NiCo<sub>2</sub>O<sub>4</sub>-NiO Biphasic Microspheres as Effective Electrocatalysts for Oxygen

Evolution Reaction, *Mater. Today Chem.*, 2019, **14**, 100215.

- 10 K. Zeng, W. Li, Y. Zhou, Z. Sun, C. Lu, J. Yan, J. Choi and R. Yang, Multilayer Hollow  $\text{MnCo}_2\text{O}_4$  Microsphere with Oxygen Vacancies as Efficient Electrocatalyst for Oxygen Evolution Reaction, *Chem. Eng. J. (Lausanne, Switz.)*, 2021, **421**, 127831.
- 11 A. Martínez-Lázaro, A. Rico-Zavala, F. I. Espinosa-Lagunes, J. Torres-González, L. Álvarez-Contreras, M. P. Gurrola, L. G. Arriaga, J. Ledesma-García and E. Ortiz-Ortega, Microfluidic Water Splitting Cell Using 3D  $\text{NiFe}_2\text{O}_4$  Hollow Spheres, *J. Power Sources*, 2019, **412**, 505-513.
