# Supplementary figures and images for: High-frequency ultrasonic pyrolysis of 200 nm ultrafine Fe-doped NiO hollow spheres for efficient oxygen evolution catalysis
Source: Royal Society of Chemistry journal article supplement (doi:10.1039/d2nj03654a), 2022-01-01

**a**

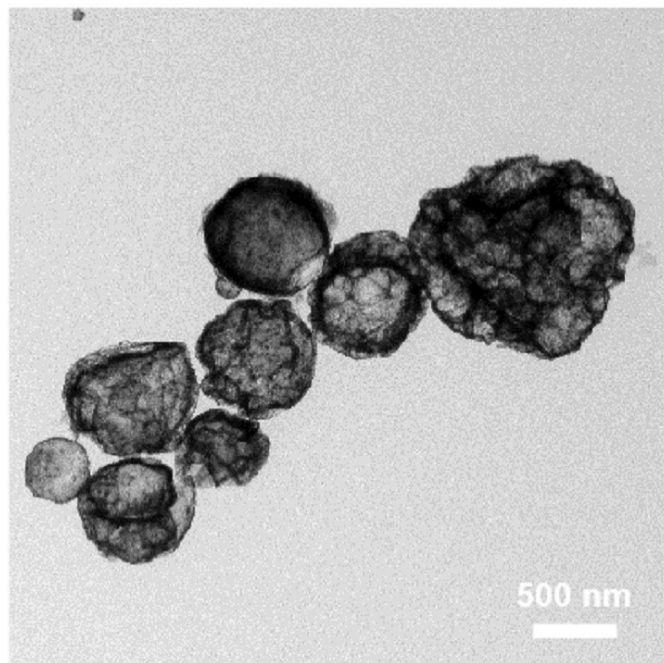

**b**

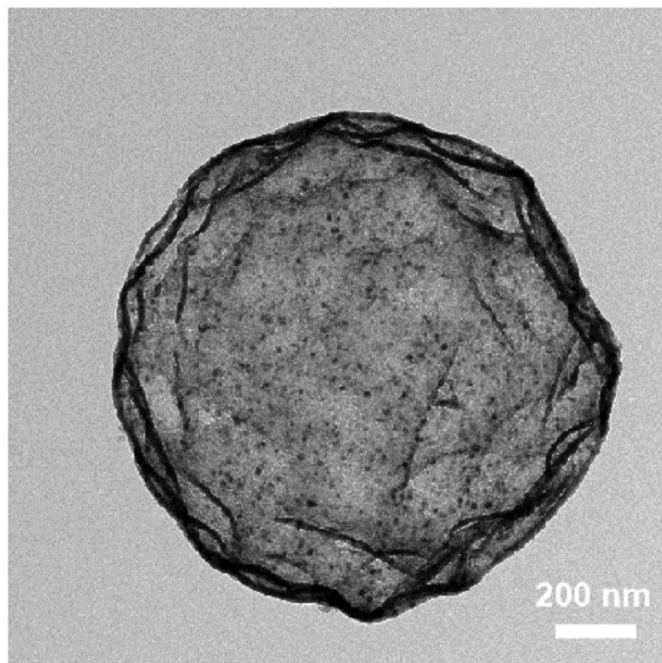

**c**

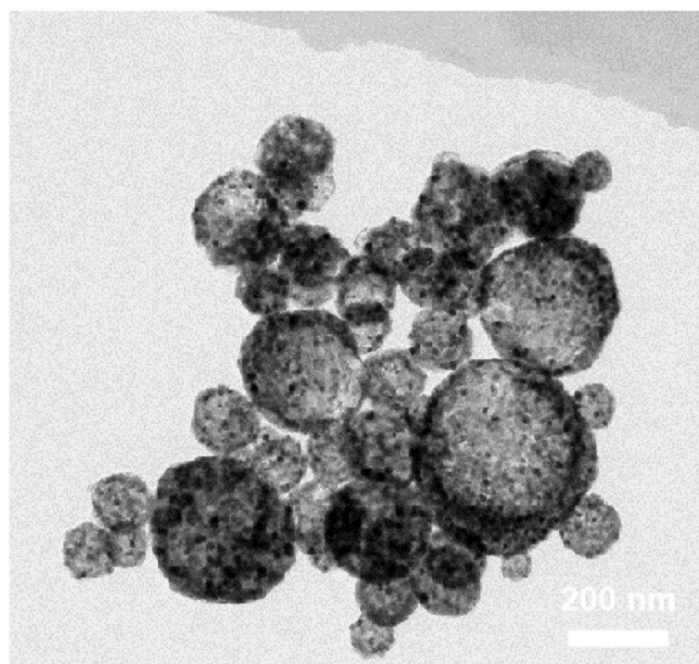

**d**

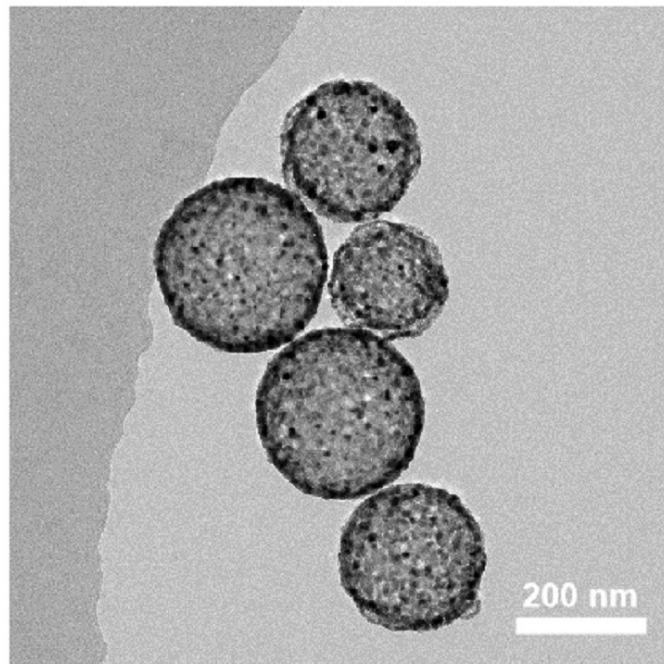

Supplement: d2nj03654a1.pdf [file d2nj03654a1.pdf]

**a**

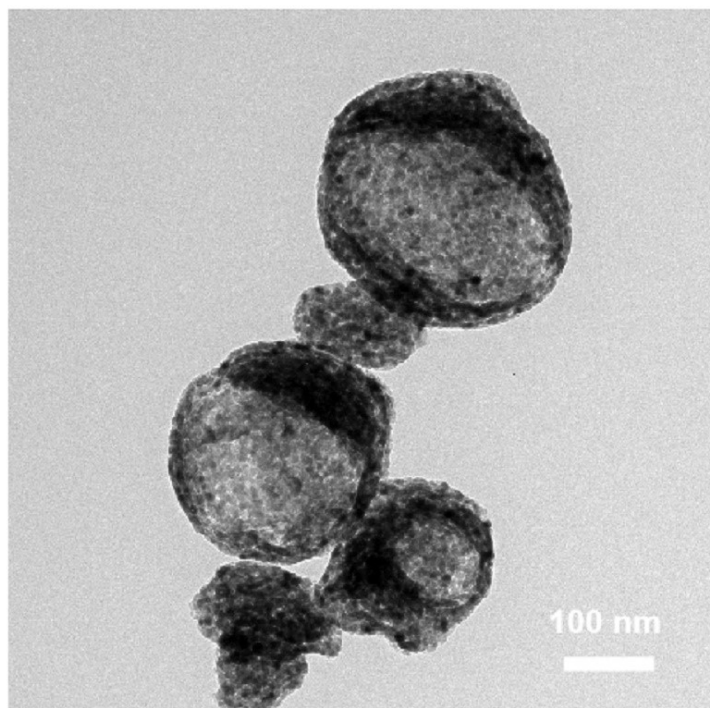

**b**

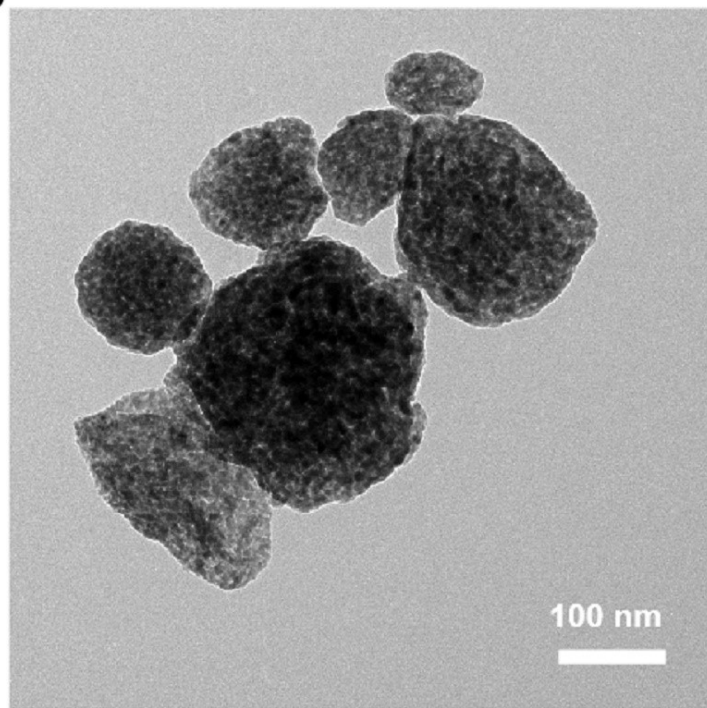

**c**

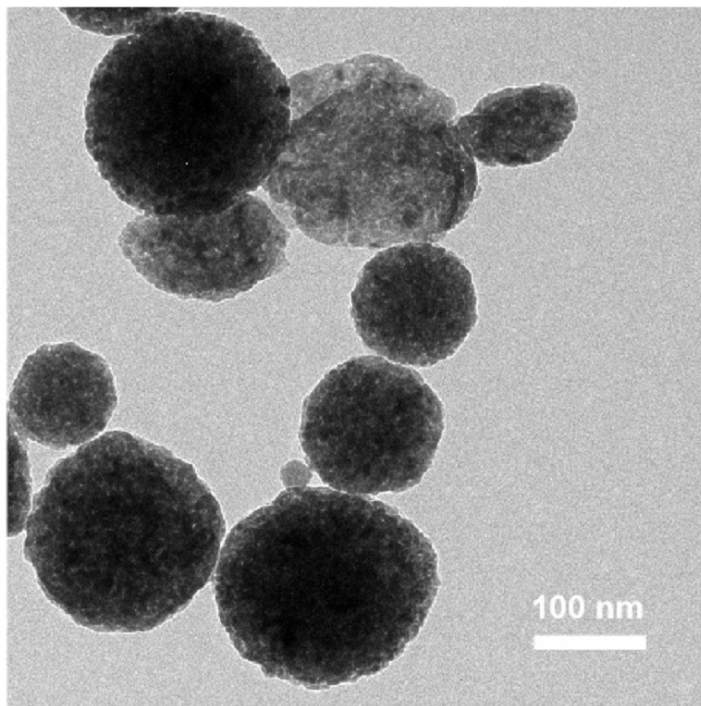

**d**

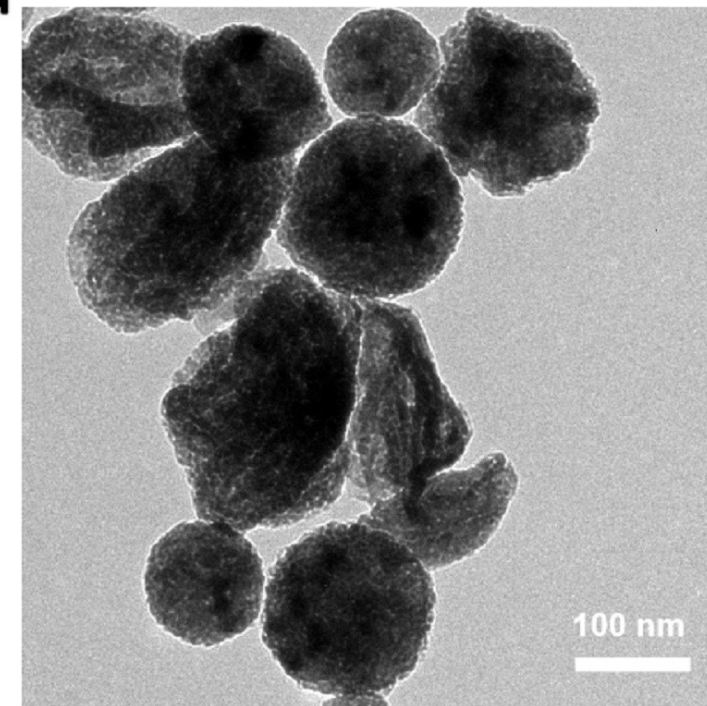

Supplement: d2nj03654a2.pdf [file d2nj03654a2.pdf]
